# Supplementary material for: Associations of dairy intake with risk of mortality in women and men: three prospective cohort studies
Source: PubMed Central journal article supplement — BMJ. 2019 Nov 27;367:l6204. doi: 10.1136/bmj.l6204 (PMC6880246; doi:10.1136/bmj.l6204), 2019-11-27
Supplement: dinm049888.ww.pdf [file dinm049888.ww.pdf]

**Table S1. Hazard ratios (95% CI) of cause-specific cancer mortality according to intakes of total dairy and subtypes of dairy by pooling the NHS, NHSII, and HPFS.**

|                                 | Dairy intake (servings) |                   |                   |                   |                   | HR (95% CI)<br>for 1-serving/d<br>increment   | P for<br>trend |
|---------------------------------|-------------------------|-------------------|-------------------|-------------------|-------------------|-----------------------------------------------|----------------|
|                                 | Category 1              | Category 2        | Category 3        | Category 4        | Category 5        |                                               |                |
| <b>Total dairy intake</b>       | Q1                      | Q2                | Q3                | Q4                | Q5                |                                               |                |
| Colorectal cancer               | 1.00                    | 0.92 (0.78, 1.10) | 0.95 (0.80, 1.13) | 0.91 (0.75, 1.09) | 1.00 (0.83, 1.21) | 1.01 (0.95, 1.07)                             | 0.86           |
| Other cancers                   | 1.00                    | 0.94 (0.89, 1.00) | 0.99 (0.93, 1.04) | 1.04 (0.98, 1.10) | 1.05 (0.99, 1.11) | 1.03 (1.01, 1.05)                             | 0.003          |
| Pancreatic cancer               | 1.00                    | 0.88 (0.73, 1.07) | 1.06 (0.87, 1.28) | 1.11 (0.92, 1.35) | 1.06 (0.86, 1.31) | 1.05 (0.98, 1.12)                             | 0.14           |
| Lung cancer                     | 1.00                    | 1.01 (0.90, 1.13) | 0.95 (0.84, 1.07) | 1.05 (0.94, 1.18) | 1.09 (0.96, 1.23) | 1.03 (0.99, 1.07)                             | 0.11           |
| Breast cancer (women only)      | 1.00                    | 0.95 (0.81, 1.12) | 0.92 (0.78, 1.09) | 1.04 (0.88, 1.24) | 1.03 (0.85, 1.24) | 1.03 (0.97, 1.08)                             | 0.34           |
| Ovarian cancer (women only)     | 1.00                    | 0.89 (0.69, 1.15) | 1.05 (0.81, 1.34) | 1.05 (0.82, 1.36) | 1.14 (0.87, 1.50) | 1.08 (0.99, 1.17)                             | 0.08           |
| Endometrial cancer (women only) | 1.00                    | 1.07 (0.74, 1.55) | 0.96 (0.65, 1.41) | 1.12 (0.76, 1.65) | 1.05 (0.69, 1.60) | 1.01 (0.89, 1.15)                             | 0.88           |
| Prostate cancer (men only)      | 1.00                    | 0.91 (0.73, 1.13) | 0.95 (0.77, 1.18) | 1.20 (0.97, 1.48) | 1.10 (0.88, 1.37) | 1.06 (0.99, 1.13)                             | 0.09           |
| <b>Skim/low-fat milk</b>        | <1/wk                   | 1-4/wk            | 4/wk-1.5/d        | ≥1.5/d            |                   | HR (95% CI)<br>for 0.5-serving/d<br>increment | P for<br>trend |
| Colorectal cancer               | 1.00                    | 0.84 (0.72, 0.99) | 0.80 (0.69, 0.94) | 0.80 (0.67, 0.96) |                   | 0.95 (0.92, 1.00)                             | 0.04           |
| Other cancers                   | 1.00                    | 0.99 (0.94, 1.04) | 1.01 (0.96, 1.06) | 1.05 (0.99, 1.11) |                   | 1.01 (0.99, 1.03)                             | 0.08           |
| Pancreatic cancer               | 1.00                    | 1.03 (0.87, 1.23) | 0.99 (0.83, 1.18) | 1.04 (0.85, 1.27) |                   | 1.00 (0.96, 1.05)                             | 0.84           |
| Lung cancer                     | 1.00                    | 0.98 (0.88, 1.08) | 1.03 (0.93, 1.14) | 1.09 (0.97, 1.22) |                   | 1.02 (0.99, 1.05)                             | 0.13           |
| Breast cancer (women only)      | 1.00                    | 0.91 (0.77, 1.06) | 0.93 (0.80, 1.09) | 0.96 (0.81, 1.15) |                   | 1.00 (0.96, 1.04)                             | 0.96           |
| Ovarian cancer (women only)     | 1.00                    | 1.00 (0.79, 1.26) | 1.03 (0.82, 1.30) | 1.13 (0.87, 1.47) |                   | 1.02 (0.97, 1.08)                             | 0.38           |
| Endometrial cancer (women only) | 1.00                    | 0.77 (0.55, 1.09) | 0.71 (0.51, 0.99) | 0.92 (0.64, 1.34) |                   | 1.01 (0.93, 1.10)                             | 0.71           |
| Prostate cancer (men only)      | 1.00                    | 1.03 (0.85, 1.25) | 1.18 (0.98, 1.42) | 1.19 (0.97, 1.46) |                   | 1.03 (0.99, 1.08)                             | 0.10           |
| <b>Whole milk</b>               | <1/mo                   | 1-3/mo            | 3/mo -2/wk        | ≥2/wk             |                   | HR (95% CI)<br>for 0.5-serving/d<br>increment | P for<br>trend |
| Colorectal cancer               | 1.00                    | 1.14 (0.95, 1.36) | 1.08 (0.89, 1.32) | 1.02 (0.85, 1.23) |                   | 1.03 (0.88, 1.20)                             | 0.70           |
| Other cancers                   | 1.00                    | 0.99 (0.93, 1.05) | 1.02 (0.96, 1.08) | 1.15 (1.09, 1.21) |                   | 1.13 (1.08, 1.18)                             | <0.001         |
| Pancreatic cancer               | 1.00                    | 0.80 (0.64, 1.01) | 1.16 (0.95, 1.42) | 1.06 (0.87, 1.30) |                   | 1.08 (0.91, 1.28)                             | 0.37           |
| Lung cancer                     | 1.00                    | 1.05 (0.93, 1.19) | 1.15 (1.02, 1.30) | 1.32 (1.19, 1.48) |                   | 1.28 (1.17, 1.41)                             | <0.001         |

|                                 |       |                   |                   |                   |                                               |                |
|---------------------------------|-------|-------------------|-------------------|-------------------|-----------------------------------------------|----------------|
| Breast cancer (women only)      | 1.00  | 1.06 (0.89, 1.27) | 0.92 (0.76, 1.11) | 1.03 (0.86, 1.23) | 1.01 (0.86, 1.20)                             | 0.88           |
| Ovarian cancer (women only)     | 1.00  | 1.20 (0.93, 1.55) | 1.06 (0.81, 1.38) | 1.44 (1.13, 1.82) | 1.35 (1.10, 1.67)                             | 0.005          |
| Endometrial cancer (women only) | 1.00  | 0.36 (0.20, 0.65) | 0.86 (0.58, 1.28) | 0.95 (0.65, 1.39) | 0.99 (0.70, 1.40)                             | 0.95           |
| Prostate cancer (men only)      | 1.00  | 1.22 (0.98, 1.53) | 1.13 (0.88, 1.45) | 1.39 (1.14, 1.69) | 1.28 (1.10, 1.50)                             | 0.002          |
| <b>Cheese</b>                   | <1/wk | 1-4/wk            | 4/wk-1.5/d        | ≥1.5/d            | HR (95% CI)<br>for 0.5-serving/d<br>increment | P for<br>trend |
| Colorectal cancer               | 1.00  | 1.06 (0.89, 1.27) | 1.01 (0.83, 1.24) | 1.29 (0.94, 1.77) | 1.05 (0.97, 1.13)                             | 0.24           |
| Other cancers                   | 1.00  | 0.96 (0.91, 1.02) | 1.01 (0.95, 1.08) | 1.01 (0.91, 1.12) | 1.02 (0.99, 1.05)                             | 0.19           |
| Pancreatic cancer               | 1.00  | 0.97 (0.79, 1.18) | 1.06 (0.85, 1.32) | 1.26 (0.88, 1.81) | 1.06 (0.96, 1.16)                             | 0.22           |
| Lung cancer                     | 1.00  | 1.05 (0.93, 1.18) | 1.13 (0.99, 1.28) | 1.01 (0.80, 1.28) | 1.03 (0.97, 1.09)                             | 0.31           |
| Breast cancer (women only)      | 1.00  | 0.99 (0.82, 1.20) | 1.03 (0.84, 1.27) | 1.21 (0.88, 1.67) | 1.05 (0.97, 1.14)                             | 0.22           |
| Ovarian cancer (women only)     | 1.00  | 0.92 (0.69, 1.22) | 1.03 (0.76, 1.40) | 1.15 (0.71, 1.85) | 1.08 (0.95, 1.22)                             | 0.22           |
| Endometrial cancer (women only) | 1.00  | 0.81 (0.54, 1.21) | 0.73 (0.47, 1.13) | 0.88 (0.42, 1.85) | 0.92 (0.75, 1.11)                             | 0.37           |
| Prostate cancer (men only)      | 1.00  | 0.94 (0.78, 1.12) | 0.87 (0.71, 1.07) | 1.04 (0.73, 1.49) | 0.98 (0.89, 1.07)                             | 0.69           |

Multivariable-adjusted model was further adjusted for family history of cancer (yes, no), family history of cardiovascular disease (yes, no), baseline disease status (hypertension, hypercholesterolemia), baseline BMI (<20.9, 21.0–22.9, 23.0–24.9, 25.0–29.9, 30.0–34.9, ≥35.0 kg/m<sup>2</sup>), physical activity (<3.0, 3.0–8.9, 9.0–17.9, 18.0–26.9, ≥27.0 MET-h/wk), overall dietary pattern (AHEI score, in quintiles), total energy intake (quintiles), smoking status (NHS and HPFS: never, former [1–4 cigarettes per day], former [5–14 cigarettes per day], former [15–24 cigarettes per day], former [25–34 cigarettes per day], former [35–44 cigarettes per day], former [45 or more cigarettes per day], former [unknown cigarettes per day], current [1–4 cigarettes per day], current [5–14 cigarettes per day], current [15–24 cigarettes per day], current [25–34 cigarettes per day], current [35–44 cigarettes per day], current [45 or more cigarettes per day], current [unknown cigarettes per day]), alcohol consumption (0, 0–5, 5–10, 10–15, ≥15g/d), postmenopausal status (yes vs no, women only) and current postmenopausal hormone use (yes vs no, women only). Subtypes of dairy foods were adjusted for each other.

**Table S2. Hazard ratios (95% CI) of total, CVD, and cancer mortality using time-varying dairy intake updated every four years as main exposure in the NHS, NHSII, and HPFS.**

|                         | Frequency of consumption |                   |                   |                   |                   | HR (95% CI) for<br>1-serving/d<br>increment | P for<br>trend |
|-------------------------|--------------------------|-------------------|-------------------|-------------------|-------------------|---------------------------------------------|----------------|
|                         | Q1                       | Q2                | Q3                | Q4                | Q5                |                                             |                |
| <b>Total mortality</b>  |                          |                   |                   |                   |                   |                                             |                |
| NHS                     | 1.00                     | 0.94 (0.90, 0.99) | 0.96 (0.91, 1.01) | 0.99 (0.94, 1.04) | 0.99 (0.94, 1.05) | 1.01 (0.99, 1.02)                           | 0.55           |
| NHSII                   | 1.00                     | 0.95 (0.81, 1.13) | 0.84 (0.70, 1.01) | 0.94 (0.78, 1.13) | 0.95 (0.78, 1.17) | 1.00 (0.95, 1.04)                           | 0.83           |
| HPFS                    | 1.00                     | 0.95 (0.90, 1.01) | 0.97 (0.92, 1.03) | 0.99 (0.93, 1.04) | 1.03 (0.97, 1.09) | 1.02 (1.00, 1.03)                           | 0.08           |
| Pooled                  | 1.00                     | 0.95 (0.91, 0.98) | 0.96 (0.93, 1.00) | 0.99 (0.95, 1.02) | 1.01 (0.97, 1.05) | 1.01 (0.99, 1.02)                           | 0.13           |
| <b>CVD mortality</b>    |                          |                   |                   |                   |                   |                                             |                |
| NHS                     | 1.00                     | 0.86 (0.77, 0.96) | 0.89 (0.79, 1.00) | 0.93 (0.82, 1.04) | 0.98 (0.87, 1.11) | 1.01 (0.97, 1.05)                           | 0.70           |
| NHSII                   | 1.00                     | 0.74 (0.44, 1.25) | 0.91 (0.53, 1.55) | 1.47 (0.88, 2.44) | 0.96 (0.52, 1.78) | 1.05 (0.93, 1.19)                           | 0.42           |
| HPFS                    | 1.00                     | 0.96 (0.87, 1.06) | 0.97 (0.88, 1.07) | 0.99 (0.90, 1.09) | 0.95 (0.86, 1.05) | 0.99 (0.96, 1.02)                           | 0.44           |
| Pooled                  | 1.00                     | 0.91 (0.85, 0.98) | 0.94 (0.87, 1.01) | 0.97 (0.90, 1.04) | 0.96 (0.89, 1.04) | 1.00 (0.97, 1.02)                           | 0.83           |
| <b>Cancer mortality</b> |                          |                   |                   |                   |                   |                                             |                |
| NHS                     | 1.00                     | 0.96 (0.88, 1.04) | 0.95 (0.88, 1.04) | 1.09 (1.01, 1.19) | 1.00 (0.91, 1.09) | 1.02 (0.99, 1.05)                           | 0.26           |
| NHSII                   | 1.00                     | 0.93 (0.74, 1.16) | 0.77 (0.60, 0.99) | 0.86 (0.67, 1.11) | 0.96 (0.73, 1.27) | 1.00 (0.94, 1.06)                           | 0.91           |
| HPFS                    | 1.00                     | 0.98 (0.89, 1.08) | 0.96 (0.87, 1.06) | 1.04 (0.94, 1.15) | 1.13 (1.02, 1.25) | 1.05 (1.02, 1.09)                           | 0.002          |
| Pooled                  | 1.00                     | 0.96 (0.91, 1.02) | 0.95 (0.89, 1.01) | 1.06 (0.99, 1.12) | 1.05 (0.98, 1.12) | 1.03 (1.01, 1.05)                           | 0.007          |

Multivariable-adjusted model was further adjusted for family history of cancer (yes, no), family history of cardiovascular disease (yes, no), baseline disease status (hypertension, hypercholesterolemia), baseline BMI (<20.9, 21.0–22.9, 23.0–24.9, 25.0–29.9, 30.0–34.9, ≥35.0 kg/m<sup>2</sup>), physical activity (<3.0, 3.0–8.9, 9.0–17.9, 18.0–26.9, ≥27.0 MET-h/wk), overall dietary pattern (AHEI score, in quintiles), total energy intake (quintiles), smoking status (NHS and HPFS: never, former [1–4 cigarettes per day], former [5–14 cigarettes per day], former [15–24 cigarettes per day], former [25–34 cigarettes per day], former [35–44 cigarettes per day], former [45 or more cigarettes per day], former [unknown cigarettes per day], current [1–4 cigarettes per day], current [5–14 cigarettes per day], current [15–24 cigarettes per day], current [25–34 cigarettes per day], current [35–44 cigarettes per day], current [45 or more cigarettes per day], current [unknown cigarettes per day]), alcohol consumption (0, 0–5, 5–10, 10–15, ≥15g/d), postmenopausal status (yes vs no, women only) and current postmenopausal hormone use (yes vs no, women only).

**Table S3. Hazard ratios (95% CI) of total, CVD, and cancer mortality according to quintile of total dairy intake in the NHS, NHSII, and HPFS excluding deaths during the first four years of follow-up.**

|                         | Frequency of consumption        |                                 |                                 |                                 |                                 | HR (95% CI) for<br>1-serving/d<br>increment | P for<br>trend |
|-------------------------|---------------------------------|---------------------------------|---------------------------------|---------------------------------|---------------------------------|---------------------------------------------|----------------|
|                         | Q1<br>(mean=0.8<br>serving/day) | Q2<br>(mean=1.5<br>serving/day) | Q3<br>(mean=2.0<br>serving/day) | Q4<br>(mean=2.8<br>serving/day) | Q5<br>(mean=4.2<br>serving/day) |                                             |                |
| <b>Total mortality</b>  |                                 |                                 |                                 |                                 |                                 |                                             |                |
| NHS                     | 1.00                            | 0.99 (0.95, 1.03)               | 0.97 (0.93, 1.02)               | 1.01 (0.97, 1.05)               | 1.07 (1.03, 1.12)               | 1.03 (1.01, 1.05)                           | <0.001         |
| NHSII                   | 1.00                            | 0.96 (0.85, 1.08)               | 1.01 (0.90, 1.14)               | 1.02 (0.89, 1.16)               | 1.18 (1.03, 1.35)               | 1.04 (1.01, 1.07)                           | 0.008          |
| HPFS                    | 1.00                            | 0.99 (0.95, 1.04)               | 1.02 (0.97, 1.07)               | 1.03 (0.99, 1.08)               | 1.05 (1.00, 1.10)               | 1.02 (1.00, 1.03)                           | 0.02           |
| Pooled                  | 1.00                            | 0.99 (0.96, 1.02)               | 1.00 (0.97, 1.03)               | 1.02 (0.99, 1.05)               | 1.07 (1.03, 1.10)               | 1.03 (1.02, 1.04)                           | <0.001         |
| <b>CVD mortality</b>    |                                 |                                 |                                 |                                 |                                 |                                             |                |
| NHS                     | 1.00                            | 0.95 (0.88, 1.03)               | 0.96 (0.89, 1.03)               | 0.99 (0.91, 1.07)               | 1.02 (0.94, 1.10)               | 1.01 (0.99, 1.04)                           | 0.36           |
| NHSII                   | 1.00                            | 0.89 (0.61, 1.30)               | 0.97 (0.65, 1.44)               | 0.93 (0.61, 1.43)               | 1.33 (0.88, 2.01)               | 1.07 (0.98, 1.17)                           | 0.14           |
| HPFS                    | 1.00                            | 0.97 (0.90, 1.05)               | 1.00 (0.92, 1.08)               | 0.96 (0.89, 1.04)               | 0.99 (0.91, 1.08)               | 1.00 (0.97, 1.02)                           | 0.89           |
| Pooled                  | 1.00                            | 0.97 (0.91, 1.03)               | 0.97 (0.91, 1.03)               | 0.95 (0.90, 1.02)               | 1.02 (0.95, 1.08)               | 1.01 (0.99, 1.03)                           | 0.49           |
| <b>Cancer mortality</b> |                                 |                                 |                                 |                                 |                                 |                                             |                |
| NHS                     | 1.00                            | 0.95 (0.88, 1.02)               | 0.96 (0.89, 1.04)               | 0.99 (0.92, 1.07)               | 1.02 (0.94, 1.10)               | 1.02 (0.99, 1.04)                           | 0.29           |
| NHSII                   | 1.00                            | 0.86 (0.71, 1.03)               | 1.05 (0.87, 1.26)               | 1.07 (0.88, 1.30)               | 1.19 (0.97, 1.46)               | 1.05 (1.01, 1.10)                           | 0.02           |
| HPFS                    | 1.00                            | 0.98 (0.90, 1.07)               | 1.04 (0.96, 1.14)               | 1.11 (1.02, 1.21)               | 1.04 (0.95, 1.14)               | 1.02 (0.99, 1.05)                           | 0.13           |
| Pooled                  | 1.00                            | 0.95 (0.90, 1.01)               | 1.00 (0.95, 1.06)               | 1.04 (0.99, 1.10)               | 1.04 (0.98, 1.10)               | 1.02 (1.01, 1.04)                           | 0.01           |

Multivariable-adjusted model was further adjusted for family history of cancer (yes, no), family history of cardiovascular disease (yes, no), baseline disease status (hypertension, hypercholesterolemia), baseline BMI (<20.9, 21.0–22.9, 23.0–24.9, 25.0–29.9, 30.0–34.9, ≥35.0 kg/m<sup>2</sup>), physical activity (<3.0, 3.0–8.9, 9.0–17.9, 18.0–26.9, ≥27.0 MET-h/wk), overall dietary pattern (AHEI score, in quintiles), total energy intake (quintiles), smoking status (NHS and HPFS: never, former [1–4 cigarettes per day], former [5–14 cigarettes per day], former [15–24 cigarettes per day], former [25–34 cigarettes per day], former [35–44 cigarettes per day], former [45 or more cigarettes per day], former [unknown cigarettes per day], current [1–4 cigarettes per day], current [5–14 cigarettes per day], current [15–24 cigarettes per day], current [25–34 cigarettes per day], current [35–44 cigarettes per day], current [45 or more cigarettes per day], current [unknown cigarettes per day]), alcohol consumption (0, 0–5, 5–10, 10–15, ≥15g/d), postmenopausal status (yes vs no, women only) and current postmenopausal hormone use (yes vs no, women only).

**Table S4. Stratified analysis for the association between total dairy consumption and risk of total mortality by meta-analyzing the NHS, NHSII, and HPFS.**

|                                          | Q1   | Q2                | Q3                | Q4                | Q5                | HR (95% CI) for<br>1-serving/d<br>increment | P for<br>interact<br>ion |
|------------------------------------------|------|-------------------|-------------------|-------------------|-------------------|---------------------------------------------|--------------------------|
| <b><i>Disease status</i></b>             |      |                   |                   |                   |                   |                                             |                          |
| Without incident cancer or CVD           | 1.00 | 1.00 (0.97, 1.04) | 1.01 (0.98, 1.06) | 1.03 (0.99, 1.08) | 1.10 (1.06, 1.15) | 1.03 (1.02, 1.04)                           |                          |
| With incident cancer or CVD              | 1.00 | 0.97 (0.93, 1.01) | 0.99 (0.95, 1.04) | 1.02 (0.98, 1.06) | 1.05 (1.01, 1.10) | 1.02 (1.01, 1.03)                           | 0.67                     |
| <b><i>CVD Medication<sup>#</sup></i></b> |      |                   |                   |                   |                   |                                             |                          |
| Without medication                       | 1.00 | 1.02 (0.98, 1.06) | 1.05 (1.01, 1.10) | 1.07 (1.03, 1.11) | 1.11 (1.06, 1.15) | 1.03 (1.02, 1.04)                           |                          |
| With medication                          | 1.00 | 0.98 (0.94, 1.02) | 0.99 (0.95, 1.03) | 1.02 (0.98, 1.07) | 1.07 (1.02, 1.12) | 1.03 (1.02, 1.04)                           | 0.56                     |
| <b><i>Follow-up time</i></b>             |      |                   |                   |                   |                   |                                             |                          |
| ≤ 14 years                               | 1.00 | 0.99 (0.93, 1.05) | 0.97 (0.91, 1.03) | 1.04 (0.98, 1.10) | 1.12 (1.05, 1.19) | 1.03 (1.02, 1.05)                           |                          |
| >14 years                                | 1.00 | 0.99 (0.95, 1.02) | 1.01 (0.97, 1.04) | 1.02 (0.99, 1.06) | 1.06 (1.03, 1.10) | 1.03 (1.02, 1.04)                           | 0.59                     |
| <b><i>Calendar year</i></b>              |      |                   |                   |                   |                   |                                             |                          |
| ≤ 2000                                   | 1.00 | 1.00 (0.96, 1.05) | 1.03 (0.99, 1.08) | 1.06 (1.01, 1.11) | 1.10 (1.05, 1.15) | 1.03 (1.02, 1.04)                           |                          |
| > 2000                                   | 1.00 | 0.97 (0.94, 1.01) | 0.97 (0.94, 1.01) | 1.00 (0.96, 1.04) | 1.05 (1.01, 1.09) | 1.02 (1.01, 1.04)                           | 0.38                     |
| <b><i>BMI</i></b>                        |      |                   |                   |                   |                   |                                             |                          |
| Non-obese (<30 kg/m <sup>2</sup> )       | 1.00 | 0.99 (0.96, 1.02) | 1.00 (0.97, 1.03) | 1.04 (1.01, 1.07) | 1.08 (1.04, 1.12) | 1.03 (1.02, 1.04)                           |                          |
| Obese (≥30 kg/m <sup>2</sup> )           | 1.00 | 0.97 (0.90, 1.05) | 0.96 (0.89, 1.04) | 0.94 (0.87, 1.02) | 1.04 (0.96, 1.14) | 1.01 (0.99, 1.03)                           | 0.03                     |
| <b><i>Age</i></b>                        |      |                   |                   |                   |                   |                                             |                          |
| ≤ 70 years                               | 1.00 | 1.00 (0.96, 1.06) | 0.98 (0.93, 1.04) | 1.03 (0.98, 1.09) | 1.13 (1.07, 1.19) | 1.03 (1.02, 1.05)                           |                          |
| >70 years                                | 1.00 | 0.98 (0.95, 1.02) | 1.01 (0.98, 1.05) | 1.02 (0.99, 1.06) | 1.06 (1.02, 1.10) | 1.03 (1.02, 1.04)                           | 0.48                     |
| <b><i>Smoking status</i></b>             |      |                   |                   |                   |                   |                                             |                          |
| Never or past smokers                    | 1.00 | 0.98 (0.95, 1.01) | 0.99 (0.96, 1.02) | 1.02 (0.99, 1.05) | 1.06 (1.03, 1.10) | 1.03 (1.02, 1.04)                           |                          |
| Current smokers                          | 1.00 | 1.05 (0.97, 1.14) | 1.07 (0.98, 1.16) | 1.07 (0.98, 1.17) | 1.16 (1.06, 1.26) | 1.04 (1.02, 1.06)                           | 0.42                     |
| <b><i>Diet quality (AHEI)</i></b>        |      |                   |                   |                   |                   |                                             |                          |
| Low (below median value)                 | 1.00 | 0.97 (0.93, 1.01) | 0.96 (0.92, 1.01) | 1.01 (0.97, 1.05) | 1.08 (1.04, 1.13) | 1.03 (1.02, 1.04)                           |                          |
| High (above median value)                | 1.00 | 1.00 (0.96, 1.04) | 1.03 (0.99, 1.08) | 1.04 (1.00, 1.08) | 1.07 (1.02, 1.12) | 1.03 (1.02, 1.04)                           | 0.42                     |
| <b><i>Physical activity</i></b>          |      |                   |                   |                   |                   |                                             |                          |

|                               |      |                   |                   |                   |                   |                   |      |
|-------------------------------|------|-------------------|-------------------|-------------------|-------------------|-------------------|------|
| Low (below median value)      | 1.00 | 0.98 (0.94, 1.01) | 0.99 (0.95, 1.02) | 1.02 (0.98, 1.05) | 1.08 (1.04, 1.12) | 1.03 (1.02, 1.04) |      |
| High (above median value)     | 1.00 | 0.99 (0.94, 1.04) | 1.00 (0.95, 1.05) | 1.01 (0.96, 1.06) | 1.03 (0.97, 1.08) | 1.02 (1.00, 1.03) | 0.32 |
| <b>Total fat intake</b>       |      |                   |                   |                   |                   |                   |      |
| Low (below median value)      | 1.00 | 0.98 (0.93, 1.02) | 1.01 (0.96, 1.06) | 1.01 (0.96, 1.06) | 1.04 (0.98, 1.10) | 1.02 (1.01, 1.04) |      |
| High (above median value)     | 1.00 | 0.99 (0.93, 1.05) | 1.02 (0.96, 1.08) | 1.08 (1.01, 1.14) | 1.11 (1.04, 1.18) | 1.03 (1.02, 1.04) | 0.32 |
| <b>Total calcium intake</b>   |      |                   |                   |                   |                   |                   |      |
| Low (below median value)      | 1.00 | 0.98 (0.94, 1.03) | 1.02 (0.97, 1.07) | 1.10 (1.05, 1.16) | 1.13 (1.06, 1.21) | 1.05 (1.03, 1.07) |      |
| High (above median value)     | 1.00 | 0.99 (0.93, 1.05) | 1.02 (0.96, 1.08) | 1.02 (0.97, 1.09) | 1.07 (1.00, 1.13) | 1.02 (1.01, 1.04) | 0.44 |
| <b>Total vitamin D intake</b> |      |                   |                   |                   |                   |                   |      |
| Low (below median value)      | 1.00 | 1.00 (0.94, 1.05) | 1.01 (0.95, 1.07) | 1.06 (1.00, 1.12) | 1.08 (1.01, 1.15) | 1.02 (1.01, 1.04) |      |
| High (above median value)     | 1.00 | 0.97 (0.92, 1.02) | 1.01 (0.96, 1.06) | 1.03 (0.98, 1.08) | 1.06 (1.01, 1.12) | 1.03 (1.01, 1.04) | 0.20 |

#Medication included aspirin, anti-hypertensive medication, and cholesterol-lowering medication.

Multivariable-adjusted model was further adjusted for family history of cancer (yes, no), family history of cardiovascular disease (yes, no), baseline disease status (hypertension, hypercholesterolemia), baseline BMI (<20.9, 21.0–22.9, 23.0–24.9, 25.0–29.9, 30.0–34.9, ≥35.0 kg/m<sup>2</sup>), physical activity (<3.0, 3.0–8.9, 9.0–17.9, 18.0–26.9, ≥27.0 MET-h/wk), overall dietary pattern (AHEI score, in quintiles), total energy intake (quintiles), smoking status (NHS and HPFS: never, former [1–4 cigarettes per day], former [5–14 cigarettes per day], former [15–24 cigarettes per day], former [25–34 cigarettes per day], former [35–44 cigarettes per day], former [45 or more cigarettes per day], former [unknown cigarettes per day], current [1–4 cigarettes per day], current [5–14 cigarettes per day], current [15–24 cigarettes per day], current [25–34 cigarettes per day], current [35–44 cigarettes per day], current [45 or more cigarettes per day], current [unknown cigarettes per day]), alcohol consumption (0, 0 - 5, 5 - 10, 10 - 15, ≥15g/d), postmenopausal status (yes vs no, women only) and current postmenopausal hormone use (yes vs no, women only).
